# Supplementary material for: Obesity-Linked Gut Microbiome Dysbiosis Associated with Derangements in Gut Permeability and Intestinal Cellular Homeostasis Independent of Diet
Source: PubMed Central journal article supplement (PMC6140100; doi:10.1155/2018/3462092), 2018-09-03
Supplement: 3462092.f1.pdf [file 3462092.f1.pdf]

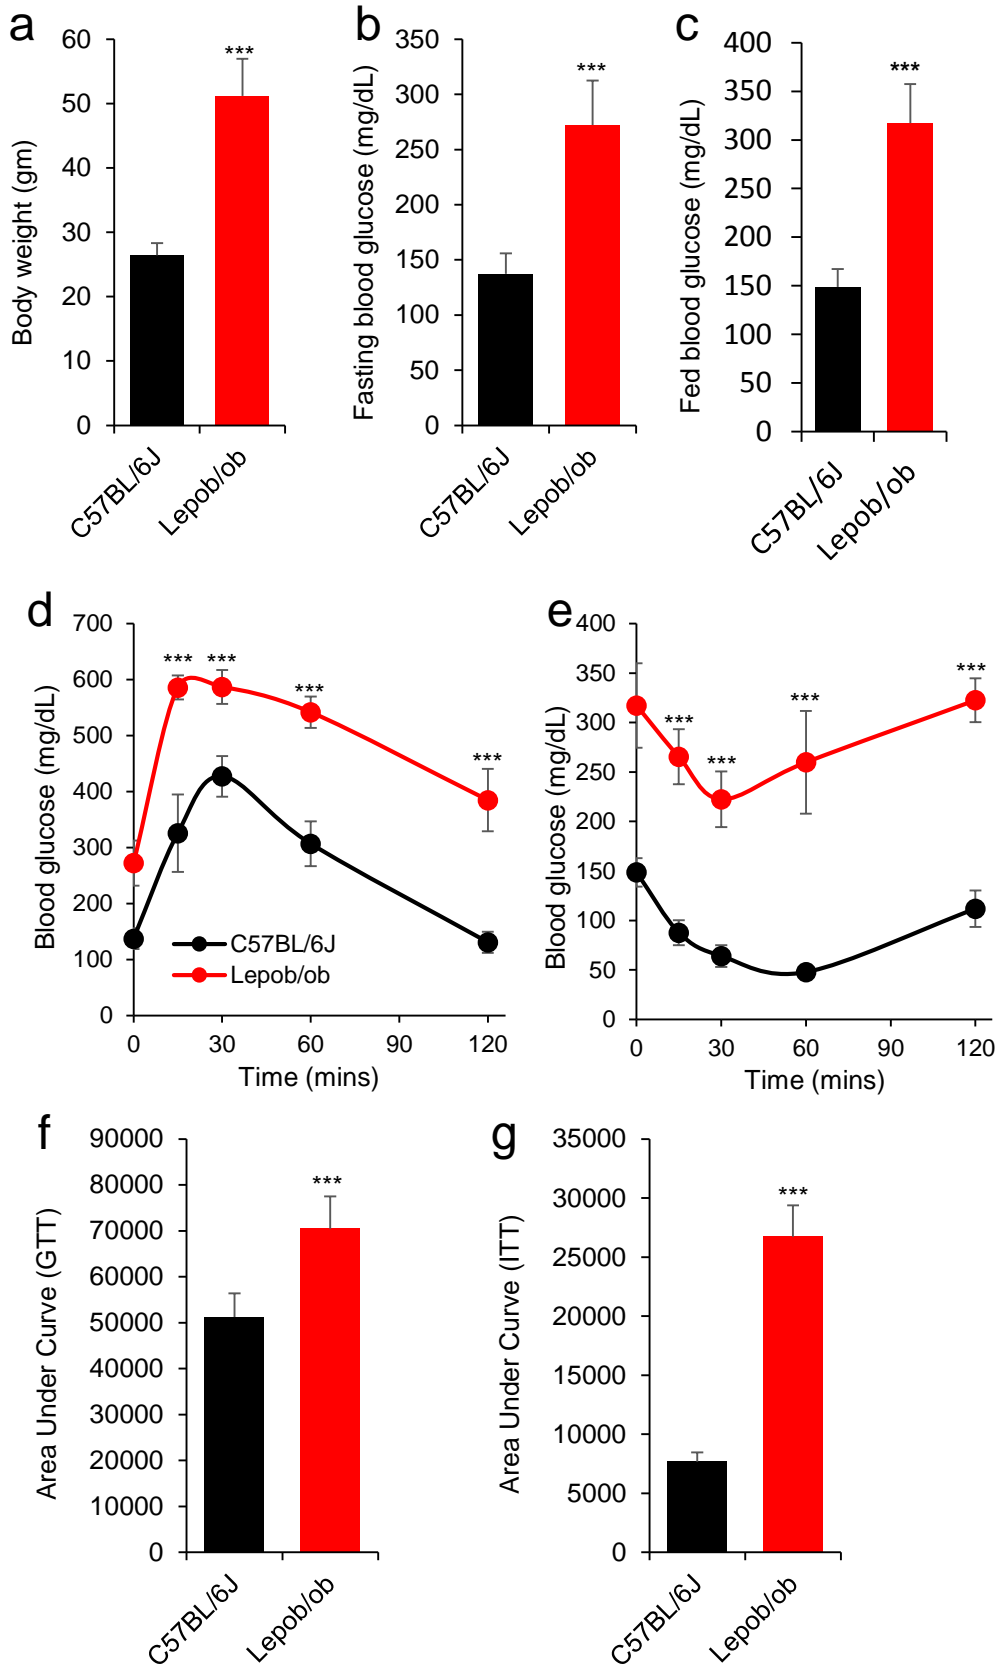

**a** PD whole tree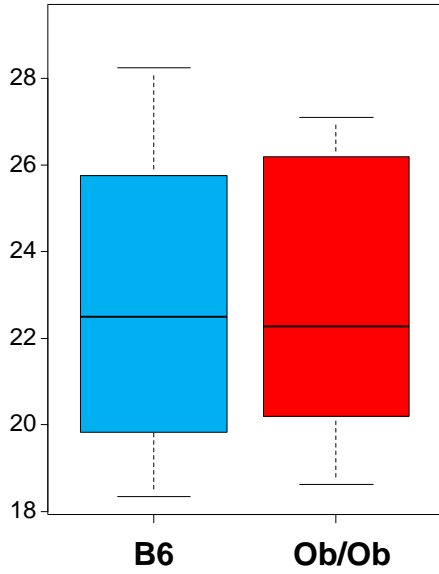**b** Chao 1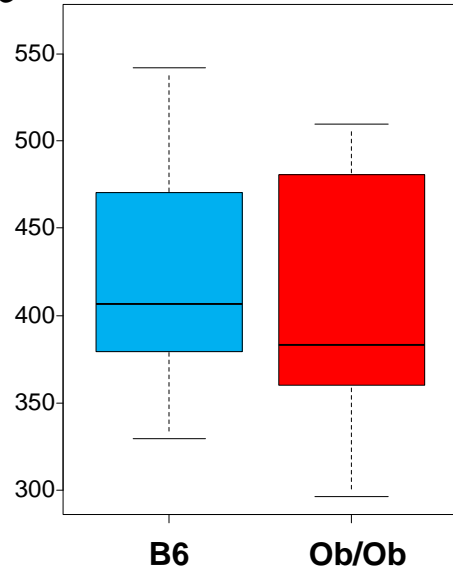**c** Observed OTUs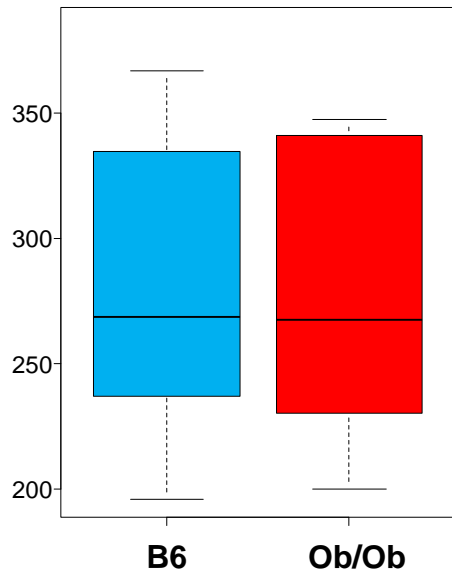**d** Shannon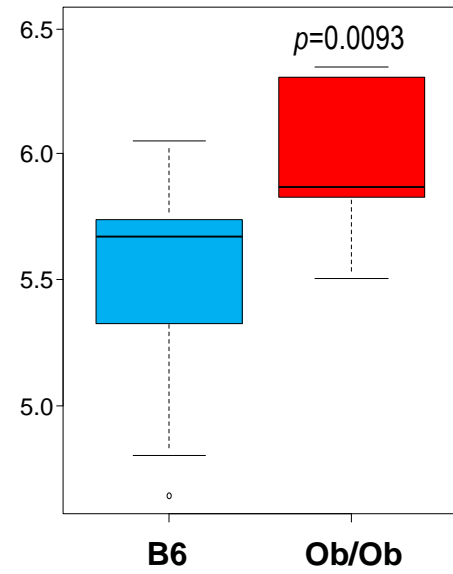

Mann-Whitney U test

Table S1: Primer sequences (mouse) used for real-time PCR (adopted from: PrimerBank: <https://pga.mgh.harvard.edu/primerbank/>)

| Gene name       | Forward primer (5'→3')   | Reverse primer (5'→3')  |
|-----------------|--------------------------|-------------------------|
| Bax             | TGAAGACAGGGGCCTTTTTG     | AATTCGCCGGAGACACTCG     |
| Bad             | AAGTCCGATCCCGGAATCC      | GCTCACTCGGCTCAAACCTCT   |
| Bcl2            | ATGCCTTTGTGGAACCTATATGGC | GGTATGCACCCAGAGTGATGC   |
| Ccnd1           | GCGTACCCTGACACCAATCTC    | CTCCTCTTCGCACTTCTGCT    |
| Cdk6            | GGCGTACCCACAGAAACCATA    | AGGTAAGGGCCATCTGAAAACCT |
| Sox4            | CGGCTGCATCGTTCTCTCC      | GGTAGACGTGCTTCACTTTCTTG |
| Lgr5            | CCTACTCGAAGACTTACCCAGT   | GCATTGGGGTGAATGATAGCA   |
| Olfm4           | CAGCCACTTTCCAATTTCACTG   | GCTGGACATACTCCTTCACCTTA |
| Bmi1            | ATCCCCACTTAATGTGTGTCCT   | CTTGCTGGTCTCCAAGTAACG   |
| Muc2            | ATGCCACCTCCTCAAAGAC      | GTAGTTTCCGTTGGAACAGTGAA |
| Muc6            | CGGCTGCGTCTGTCCTAAG      | GCATAGTCACATGGGCATTCC   |
| Occludin (Ocln) | TTGAAAGTCCACCTCCTTACAGA  | CCGGATAAAAAGAGTACGCTGG  |
| Zo1 (Tjp1)      | CCGCTAAGAGCACAGCAA       | TCCCCACTCTGAAAATGAGGA   |
| Jam             | TCTCTTCACGTCTATGATCCTGG  | TTTGATGGACTCGTTCTCGGG   |
| 18S rRNA        | GTAACCCGTTGAACCCATT      | CCATCCAATCGGTAGTAGCG    |

Table S2: Relative abundance of different microbial communities that significantly different in Lepob/ob versus C57BL/6J (B6) mice

|                                     | B6                    |      | Ob/Ob |       | P value (T-test) |
|-------------------------------------|-----------------------|------|-------|-------|------------------|
|                                     | Avg                   | SD   | Avg   | SD    |                  |
|                                     | Relative abundance, % |      |       |       |                  |
| <i>Bacteroidales</i>                | 64.16                 | 7.76 | 50.43 | 10.94 | 0.0018           |
| <i>Bacteroidales</i> ;f__S24-7      | 61.81                 | 7.50 | 47.38 | 10.35 | 0.0008           |
| <i>Bacteroidales</i> ;f__S24-7;g__  | 61.81                 | 7.50 | 47.38 | 10.35 | 0.0008           |
| <i>Bacteroidia</i>                  | 64.16                 | 7.76 | 50.43 | 10.94 | 0.0018           |
| <i>Clostridia</i>                   | 31.92                 | 8.74 | 43.01 | 13.11 | 0.0233           |
| <i>Clostridiales</i>                | 31.92                 | 8.74 | 43.01 | 13.11 | 0.0233           |
| <i>Clostridiales</i> ;f__           | 20.12                 | 5.54 | 25.88 | 7.87  | 0.0502           |
| <i>Clostridiales</i> ;f__;g__       | 20.12                 | 5.54 | 25.88 | 7.87  | 0.0502           |
| <i>Lachnospiraceae</i>              | 3.38                  | 1.26 | 5.18  | 1.83  | 0.0102           |
| <i>Lachnospiraceae</i> ;g__         | 2.40                  | 1.23 | 4.04  | 2.22  | 0.0354           |
| <i>Oscillospira</i>                 | 5.17                  | 2.11 | 7.38  | 2.83  | 0.0412           |
| <i>Ruminococcaceae</i>              | 7.98                  | 3.00 | 11.10 | 4.42  | 0.0550           |
| <i>Verrucomicrobiaceae</i>          | 1.33                  | 0.92 | 3.23  | 2.42  | 0.0227           |
| <i>Verrucomicrobiae</i>             | 1.33                  | 0.92 | 3.23  | 2.42  | 0.0227           |
| <i>Verrucomicrobiales</i>           | 1.33                  | 0.92 | 3.23  | 2.42  | 0.0227           |
| <i>Akkermansia</i>                  | 1.33                  | 0.92 | 3.23  | 2.42  | 0.0227           |
| <i>Pedobacter kwangyangensis</i>    | 2.10                  | 1.55 | 7.49  | 2.51  | 0.0000           |
| <i>Blautia hansenii</i>             | 2.65                  | 1.24 | 5.19  | 1.73  | 0.0004           |
| <i>Akkermansia muciniphila</i>      | 1.17                  | 0.76 | 3.19  | 2.43  | 0.0163           |
| <i>Alkaliphilus crotonatoxidans</i> | 2.78                  | 1.08 | 0.80  | 0.35  | 0.0000           |

Table S3: Spearman correlation analysis among metabolic, gut permeability, intestinal structural and gene expression analysis with gut microbiome signature of Lepob/ob and C57BL/6J mice.

|                        |   | Prob >  r  under H0: Rho=0 |               |          |          |                  |              |             |           |          |          |
|------------------------|---|----------------------------|---------------|----------|----------|------------------|--------------|-------------|-----------|----------|----------|
|                        |   | Number of Observations     |               |          |          |                  |              |             |           |          |          |
|                        |   | Body_weight                | Blood_glucose | AUC_GTT_ | AUC_ITT_ | Gut_permeability | Villi_length | Crypt_depth | __budding | Bad      | Bax      |
| Bacteroidetes          | r | -0.59504                   | -0.57432      | 0.29963  | 0.41844  | -0.45722         | 0.58844      | -0.25919    | 0.37143   | -0.31429 | -0.71429 |
| Bacteroidetes          | p | 0.0022                     | 0.0033        | 0.1549   | 0.0419   | 0.0491           | 0.0441       | 0.4159      | 0.4685    | 0.5441   | 0.1108   |
|                        | n | 24                         | 24            | 24       | 24       | 19               | 12           | 12          | 6         | 6        | 6        |
| Firmicutes             | r | 0.50054                    | 0.50435       | -0.18870 | -0.35225 | 0.39123          | -0.60245     | 0.28021     | -0.37143  | 0.31429  | 0.71429  |
| Firmicutes             | p | 0.0127                     | 0.0120        | 0.3772   | 0.0914   | 0.0977           | 0.0382       | 0.3777      | 0.4685    | 0.5441   | 0.1108   |
|                        | n | 24                         | 24            | 24       | 24       | 19               | 12           | 12          | 6         | 6        | 6        |
| Verrucomicrobia        | r | 0.46899                    | 0.29508       | -0.58268 | -0.47138 | 0.45391          | -0.34676     | 0.38529     | -0.65714  | 0.60000  | 0.60000  |
| Verrucomicrobia        | p | 0.0208                     | 0.1616        | 0.0028   | 0.0201   | 0.0509           | 0.2695       | 0.2161      | 0.1562    | 0.2080   | 0.2080   |
|                        | n | 24                         | 24            | 24       | 24       | 19               | 12           | 12          | 6         | 6        | 6        |
| F_B_ratio              | r | 0.53165                    | 0.53700       | -0.23097 | -0.38242 | 0.41860          | -0.59649     | 0.27018     | -0.37143  | 0.31429  | 0.71429  |
| F-B ratio              | p | 0.0075                     | 0.0068        | 0.2775   | 0.0651   | 0.0745           | 0.0406       | 0.3957      | 0.4685    | 0.5441   | 0.1108   |
|                        | n | 24                         | 24            | 24       | 24       | 19               | 12           | 12          | 6         | 6        | 6        |
| Bacteroidales_f_S24_7  | r | -0.63188                   | -0.61445      | 0.36522  | 0.45532  | -0.56316         | 0.70753      | -0.42732    | 0.60000   | -0.48571 | -0.77143 |
| Bacteroidales;f__S24-7 | p | 0.0009                     | 0.0014        | 0.0793   | 0.0254   | 0.0121           | 0.0101       | 0.1659      | 0.2080    | 0.3287   | 0.0724   |
|                        | n | 24                         | 24            | 24       | 24       | 19               | 12           | 12          | 6         | 6        | 6        |
| Lachnospiraceae        | r | 0.38555                    | 0.64032       | -0.25973 | -0.27589 | 0.43108          | -0.44483     | 0.26270     | -0.94286  | 0.82857  | 0.65714  |
| Lachnospiraceae        | p | 0.0628                     | 0.0008        | 0.2203   | 0.1919   | 0.0654           | 0.1473       | 0.4094      | 0.0048    | 0.0416   | 0.1562   |
|                        | n | 24                         | 24            | 24       | 24       | 19               | 12           | 12          | 6         | 6        | 6        |
| Clostridiales_f__      | r | 0.39182                    | 0.47259       | -0.07217 | -0.28484 | 0.31754          | -0.52189     | 0.21366     | -0.42857  | 0.37143  | 0.77143  |
| Clostridiales;f__      | p | 0.0583                     | 0.0197        | 0.7375   | 0.1773   | 0.1852           | 0.0818       | 0.5049      | 0.3965    | 0.4685   | 0.0724   |
|                        | n | 24                         | 24            | 24       | 24       | 19               | 12           | 12          | 6         | 6        | 6        |
| Oscillospira           | r | 0.49043                    | 0.41694       | -0.20448 | -0.30527 | 0.24232          | -0.56140     | 0.30175     | -0.08571  | 0.02857  | 0.31429  |
| Oscillospira           | p | 0.0150                     | 0.0427        | 0.3378   | 0.1469   | 0.3175           | 0.0575       | 0.3405      | 0.8717    | 0.9572   | 0.5441   |
|                        | n | 24                         | 24            | 24       | 24       | 19               | 12           | 12          | 6         | 6        | 6        |
| Lachnospiraceae_g__    | r | 0.27099                    | 0.53928       | -0.17221 | -0.21183 | 0.44142          | -0.29072     | 0.12259     | -0.60000  | 0.48571  | 0.20000  |
| Lachnospiraceae;g__    | p | 0.2003                     | 0.0065        | 0.4210   | 0.3204   | 0.0585           | 0.3593       | 0.7043      | 0.2080    | 0.3287   | 0.7040   |
|                        | n | 24                         | 24            | 24       | 24       | 19               | 12           | 12          | 6         | 6        | 6        |
| Akkermansia            | r | 0.46899                    | 0.29508       | -0.58268 | -0.47138 | 0.45391          | -0.34676     | 0.38529     | -0.65714  | 0.60000  | 0.60000  |
| Akkermansia            | p | 0.0208                     | 0.1616        | 0.0028   | 0.0201   | 0.0509           | 0.2695       | 0.2161      | 0.1562    | 0.2080   | 0.2080   |
|                        | n | 24                         | 24            | 24       | 24       | 19               | 12           | 12          | 6         | 6        | 6        |
